# Supplementary material for: Gdf11 gene transfer prevents high fat diet-induced obesity and improves metabolic homeostasis in obese and STZ-induced diabetic mice
Source: Springer Nature journal article supplement (doi:10.1186/s12967-019-02166-1), 2019-12-01
Supplement: MOESM2 [file 23189038]

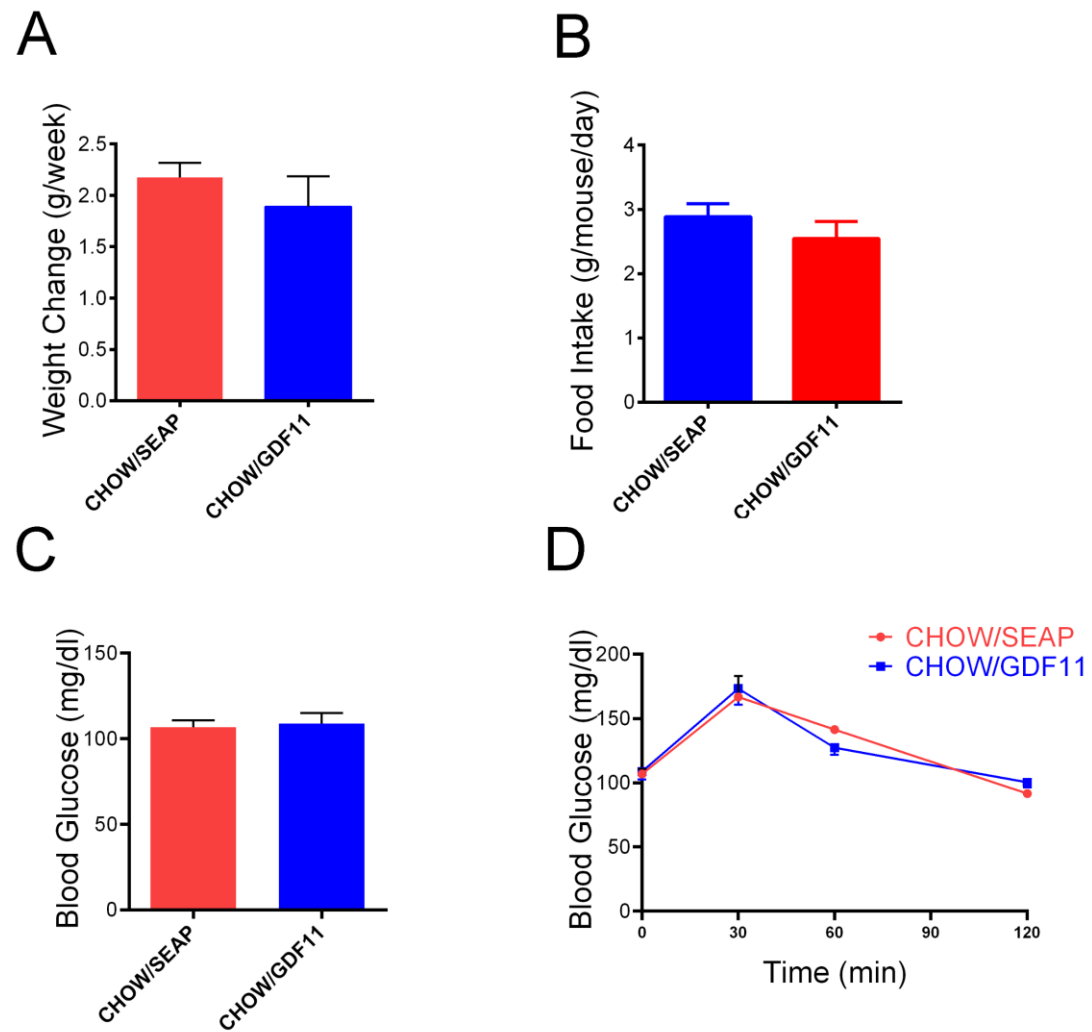

**Figure S1. Impacts of *Gdf11* gene transfer on Chow-fed mice.** Chow-fed mice were injected with pLIVE-GDF11 or control plasmids and continued on HFD for 6 weeks. (A) Change of body weight after gene transfer; (B) Daily food intake; (C) Fasting blood glucose level after gene transfer; (D) Serum glucose level in GTT on day 6 weeks after gene transfer.
